# Supplementary material
Source: PubMed Central journal article supplement (PMC4801666)
Supplement: NIHMS754837-supplement.pdf [file NIHMS754837-supplement.pdf]

- Studies assessing the relationship between crime and activity show mixed results.
- Prior studies largely use self-reported physical activity and location estimations.
- This study uses objective measures for location and physical activity.
- We test the association between objectively measured crime and physical activity.
- A strong positive association exists between crime and adolescent physical activity.
